# Supplementary material
Source: Springer Nature journal article supplement (https://www.springermedizin.de/resource/supplementary/12888_2010_820_MOESM2_ESM.pdf/9478868)
Supplement: MOESM2 [file 9478868]

|                           |           | N100                                                                              | N200                                                                              | P200                                                                              | P300                                                                               |
|---------------------------|-----------|-----------------------------------------------------------------------------------|-----------------------------------------------------------------------------------|-----------------------------------------------------------------------------------|------------------------------------------------------------------------------------|
| Auditory Without Counting | Amplitude | 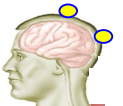  |   |   |   |
|                           | Latency   |                                                                                   |  |                                                                                   |  |
| Auditory With Counting    | Amplitude |  |  |  |  |
|                           | Latency   |                                                                                   |  |                                                                                   |  |
| Visual Without Counting   | Amplitude |  |                                                                                   |                                                                                   |                                                                                    |
|                           | Latency   |                                                                                   |                                                                                   |                                                                                   |  |
| Visual With Counting      | Amplitude |  |  |                                                                                   |                                                                                    |
|                           | Latency   |                                                                                   |                                                                                   |                                                                                   |                                                                                    |
